# Supplementary material for: Pathogenicity of Aeromonas veronii Causing Mass Mortality of Largemouth Bass (Micropterus salmoides) and Its Induced Host Immune Response
Source: MDPI journal article supplement (doi:10.3390/microorganisms10112198), 2022-11-06
Supplement: s1 [file s1]

**Table S2.** The primers used for the qRT-PCR.

| Gene                            | Primer sequences (5'-3')                        | Product length (bp) |
|---------------------------------|-------------------------------------------------|---------------------|
| <i>IgM</i>                      | CTCAATGACCCCCCTAA<br>CAAGCCAAGACACCAAAA         | 195                 |
| <i>HIF-1</i>                    | CAGAGGACCTGTTGAATCGTT<br>TTGTAGATGACAGTGGCTTGG  | 215                 |
| <i>Hep</i>                      | CATTCAACGGGGTGCAA<br>CCTGATGTGATTTGGCATCATC     | 186                 |
| <i>IL15</i>                     | GTATGCTGCTTCTGTGCCTGG<br>AGCGTCAGATTCTCAATGGTGT | 165                 |
| <i>TGF-<math>\beta</math></i>   | GCTCAAAGAGAGCGAGGATG<br>TCCTCTACCATTTCGCAATCC   | 157                 |
| <i>Cas3</i>                     | GCTTCATTTCGTCTGTGTTC<br>CGAAAAAGTGATGTGAGGTA    | 163                 |
| <i><math>\beta</math>-actin</i> | CCCAGAGCAAGAGAGGTATC<br>GCTGTGGTGGTGAAGGAGTAG   | 232                 |
