# Supplementary material for: Pathogenicity of Aeromonas veronii Causing Mass Mortality of Largemouth Bass (Micropterus salmoides) and Its Induced Host Immune Response
Source: MDPI journal article supplement (doi:10.3390/microorganisms10112198), 2022-11-06
Supplement: s1 [file s1]

**Table S3.** The 16S rRNA and *gyrB* sequences of strain GJL1.

| Name | Gene        | Sequence                                                                                                                                                                                                                                                                                                                                                                                                                                                                                                                                                                                                                                                                                                                                                                                                                                                                                                                                                                                                                                                                                                                                                                                                                                                                                                                                                                                                                                                                                                                                                                                                                            |
|------|-------------|-------------------------------------------------------------------------------------------------------------------------------------------------------------------------------------------------------------------------------------------------------------------------------------------------------------------------------------------------------------------------------------------------------------------------------------------------------------------------------------------------------------------------------------------------------------------------------------------------------------------------------------------------------------------------------------------------------------------------------------------------------------------------------------------------------------------------------------------------------------------------------------------------------------------------------------------------------------------------------------------------------------------------------------------------------------------------------------------------------------------------------------------------------------------------------------------------------------------------------------------------------------------------------------------------------------------------------------------------------------------------------------------------------------------------------------------------------------------------------------------------------------------------------------------------------------------------------------------------------------------------------------|
| GJL1 | 16sRNA      | GAAATCGCGGCTACCATGCAGTCGAGCGGCAGCGGGAAAGTAG<br>CTTGCTACTTTTGCCGGCGAGCGGCGGACGGGTGAGTAATGCCT<br>GGGGATCTGCCCAGTCGAGGGGGATAACTACTGGAAACGGTAG<br>CTAATACCGCATACGCCCTACGGGGGAAAGCAGGGGACCTTCG<br>GGCCTTGCGCGATTGGATGAACCCAGGTGGGATTAGCTAGTTGG<br>TGAGGTAATGGCTCACCAAGGCGACGATCCCTAGCTGGTCTGA<br>GAGGATGATCAGCCACACTGGAAGTGAAGACACGGTCCAGACTC<br>CTACGGGAGGCAGCAGTGGGGAATATTGCACAATGGGGGAAAC<br>CCTGATGCAGCCATGCCGCGTGTGTGAAGAAGGCCTTCGGGTT<br>GTAAAGCACTTTCAGCGAGGAGGAAAGGTTGGTAGCTAATAAC<br>TGCCAGCTGTGACGTTACTCGCAGAAGAAGCACCGGCTAACTC<br>CGTGCCAGCAGCCGCGGTAATACGGAGGGTGCAAGCGTTAATC<br>GGAATTACTGGGCGTAAAGCGCACGCAGGCGGTTGGATAAGTT<br>AGATGTGAAAGCCCCGGGCTCAACCTGGGAATTGCATTAAAA<br>CTGTCCAGCTAGAGTCTTGTAGAGGGGGGTAGAATTCCAGGTGT<br>AGCGGTGAAATGCGTAGAGATCTGGAGGAATACCGGTGGCGAA<br>GGCGGCCCCCTGGACAAAGACTGACGCTCAGGTGCGAAAGCG<br>TGGGGAGCAAACAGGATTAGATACCTGGTAGTCCACGCCGTA<br>AACGATGTCGATTTGGAGGCTGTGTCCTTGAGACGTGGCTTCCG<br>GAGCTAACGCGTTAAATCGACCGCCTGGGGAGTACGGCCGCAA<br>GGTTAAAACTCAAATGAATTGACGGGGGCCCCGCACAAGCGGTG<br>GAGCATGTGGTTTAATTGATGCAACGCGAAGAACCTTACCTGG<br>CCTTGACATGTCTGGAATCCTGCAGAGATGCGGGAGTGCCTTCG<br>GGAATCAGAACACAGGTGCTGCATGGCTGTCGTCAGCTCGTGT<br>CGTGAGATGTTGGGTAAAGTCCCGCAACGAGCGCAACCCCTGT<br>CCTTTGTTGCCAGCACGTAATGGTGGGAAGTCAAGGGAGACTG<br>CCGGTGATAAACCGGAGGAAGGTGGGGATGACGTCAAGTCATC<br>ATGGCCCTTACGGCCAGGGCTACACACGTGCTACAATGGCGCGT<br>ACAGAGGGCTGCAAGCTAGCGATAGTGAGCGAATCCCCAAAAG<br>CGCGTCGTAGTCCGGATCGGAGTCTGCAACTCGACTCCGTGAA<br>GTCGGAATCGCTAGTAATCGCAAATCAGAATGTTGCGGTGAATA<br>CGTTCCCGGGCCTTGTACACACCGCCCGTCACACCATGGGAGT<br>GGGTTGCACCAGAAGTAGATAGCTTAACCTTCGGGAGGGCGTT<br>ACCACGGTTATATC |
|      | <i>gyrB</i> | CTGTTGCTGACTATTCGTCGTAACGGCCACGTCTACGAGCAGAC<br>CTATCATCTGGGTGAGCCACAGGCGCCGCTCAAGCAGATTGGC<br>GACAGCACCGGCACCGGTACCGAAGTTCGCTTCTGGCCGAGCC<br>CGGCCATTTTCAGCGATACCCTGTTCCACTACGAGATCCTGGCC<br>AAGCGCCTGCGCGAGCTCTCTTTCCTCAACTCCGGTGTCTCCAT<br>CCGTCTGCAAGATGAGCGTGATGGCCGCGAGGCGCATTTCTGCT<br>ACGAGGGTGGCATCAAGGCATTCGTTGAATACCTGAACCAGAA                                                                                                                                                                                                                                                                                                                                                                                                                                                                                                                                                                                                                                                                                                                                                                                                                                                                                                                                                                                                                                                                                                                                                                                                                                                                                           |

---

CAAGACCCCGATCCACCCGAAGGTGTTCCATTTACCACCGAG  
CAGGATGGTATCGGCGTTGAAGTGGCGATGCAGTGGAACGACG  
CCTATCAGGAAGGGGTCTACTGCTTCACCAACAACATCCCGCAG  
CGGGATGGTGGTACTCACCTCGTTGGCTTCCGTACCGCGCTGAC  
CCGTACTCTGAACTCCTATATGGACAAAGAGGACTACAGCAAG  
AAGGCCAAGTCTGCCGCCAGTGGCGACGACGTACGTGAAGGTC  
TGATTGCCGTTATCTCCGTGAAGGTGCCGGATCCCAAGTTCTCC  
TCCCAGACCAAAGACAAGCTGGTCTCTTCCGAAGTGAAGACCG  
CCGTTGAACAGGCGATGGGTGAGAAGCTGGCTGACTTCCTGCT  
GGAAAACCCGGGCGATGCCAAGATCGTGGTCAACAAGATCATC  
GATGCGGCCCCTGCCCGCAAGCGGCCCGCAAAGCCCGCGAA  
CTGACCCGCCGCAAAGGCGCGCTGGATATCGCCGGTCTGCCCCG  
GCAAGCTGGCTGACTGTCAGGAAAAAGACCCGGCTCTCTCCGA  
ACTCTACATAGTGGAAGGGGACTCTGCTGGCGGTTCCGCCAAG  
CAGGGTCGCAACCGTAAAAACCAGGCCATTCTGCCGCTCAAGG  
GCAAGATCCTGAACGTGGAGAAGGCCCGTTTCGACAAGATGAT  
CTCCTCGCAAGAGGTGGGCACCCTGATCA

---
