# Supplementary material for: Pathogenicity of Aeromonas veronii Causing Mass Mortality of Largemouth Bass (Micropterus salmoides) and Its Induced Host Immune Response
Source: MDPI journal article supplement (doi:10.3390/microorganisms10112198), 2022-11-06
Supplement: s1 [file s1]

**Table S1.** The primers used for the PCR.

| Gene        | Primer sequences (5'-3')                        | Product length (bp) |
|-------------|-------------------------------------------------|---------------------|
| <i>ompA</i> | GCGGTTTATCGCTTTGGT<br>CACGCTTGGAAGTTGCTGA       | 397                 |
| <i>flgA</i> | GGGACCTGCTGAGTGAAA<br>GACCGATACGGCACCTAC        | 362                 |
| <i>flgM</i> | GCTACTGTCAAGCTGGACTC<br>AGATTGGCCTCGAAACTG      | 194                 |
| <i>flgN</i> | AGTTGCTTGCTGCGATAGA<br>AGACGACGGTTTGAGACG       | 181                 |
| <i>aer</i>  | CCTATGGCCTGAGCGAGAAG<br>CCAGTTCCAGTCCCACCACT    | 417                 |
| <i>act</i>  | AGAAGGTGACCACCAAGAACA<br>AACTGACATCGGCCTTGAAGTC | 232                 |
| <i>exu</i>  | AGACATGCACAACCTCTTCC<br>GATTGGTATTGCCCTGCAAC    | 323                 |
| <i>hly</i>  | CGGACGATTATCAGGATGG<br>CAAGAACGAGTTTCAGTGGC     | 289                 |
